# Supplementary material for: Low dose allopurinol is associated with modest but significant improvements in glycemic control (GC) and glycemic variability (GV) in patients with type 2 diabetes mellitus: A cross-sectional study
Source: Research Square preprint supplement (doi:10.21203/rs.3.rs-491373/v1), 2021-05-12
Supplement: Supplementary file 1 [file df509d61bdfac3adaada392a.pdf]

**Table 1: Demographic, and clinical comparisons between patients groups**

| Parameter                                | Allopurinol group<br>N=97 | Control group<br>N=97 | P value     |
|------------------------------------------|---------------------------|-----------------------|-------------|
| Age (years)                              | 59.35 ± 13.18             | 59.56 ± 13.41         | 0.914       |
| Sex (Males)                              | 71 (73.20%)               | 71 (73.20%)           | 1.000       |
| Height (cm)                              | 165.05 ± 10.11            | 164.36 ± 8.43         | 0.609       |
| Weight (Kg)                              | 89.00 (71.50, 104.50)     | 82.00 (69.00, 94.00)  | 0.020       |
| BMI                                      | 31.4 (28.05, 37.50)       | 30.20 (25.55, 34.15)  | 0.029       |
| <i>Co-morbidities</i>                    |                           |                       |             |
| Systemic Hypertension                    | 83 (85.57%)               | 65 (67.01%)           | 0.002       |
| Pre-diabetes                             | 6 (6.19%)                 | 1 (1.03%)             | 0.054       |
| Diabetes mellitus type 2                 | 91 (93.81%)               | 96 (98.97%)           | 0.054       |
| Ischemic heart disease                   | 27 (27.84%)               | 25 (25.77%)           | 0.746       |
| Chronic heart failure                    | 12 (12.37%)               | 7 (7.22%)             | 0.227       |
| Cardiac arrhythmias /Atrial fibrillation | 8 (8.25%)/6 (6.19%)       | 5 (5.15%)/3 (3.09%)   | 0.389/0.306 |
| Transient ischemic attacks/ Stroke       | 2 (2.06%)/7 (7.22%)       | 2 (2.06%)/13 (13.40%) | 1.000/0.157 |
| Chronic kidney disease                   | 35 (36.08%)               | 7 (7.22%)             | <0.001      |
| Dyslipidemia                             | 57 (58.76%)               | 53 (54.64%)           | 0.562       |
| <i>Allopurinol indication*</i>           |                           |                       |             |
| Gout                                     | 34 (35.05%)               | -                     | -           |

|                                              |                         |                         |        |
|----------------------------------------------|-------------------------|-------------------------|--------|
| Asymptomatic hyperuricemia                   | 57 (58.76%)             | -                       |        |
| Renal stones (multiple/recurrent)            | 2 (2.06%)               |                         |        |
| <i>Allopurinol therapy daily dose</i>        |                         |                         |        |
| 100 (mg/day)                                 | 75 (77.32%)             | -                       |        |
| 200 (mg/day)                                 | 7 (7.22%)               | -                       |        |
| 300 (mg/day)                                 | 14 (14.43%)             | -                       |        |
| 400 (mg/day)                                 | 1 (1.03%)               | -                       |        |
| <i>Allopurinol therapy duration (months)</i> | 39.50 (10.95, 82.78)    | -                       |        |
| <i>Diabetes related biochemistry</i>         |                         |                         |        |
| Glycated hemoglobin (%)                      | 6.90 (6.20, 7.80)       | 7.30 (6.60, 8.40)       | 0.010  |
| Fasting blood sugar (mg/dL)**                | 122.50 (105.88, 142.00) | 131.67 (109.42, 166.50) | 0.072  |
| <i>Variability of FBS***</i>                 |                         |                         |        |
| Standard deviation (mean)                    | 19.94                   | 26.47                   | 0.231  |
| Coefficient of variation                     | 14.03%                  | 16.61%                  | 0.256  |
| Variability independent of the mean (VIM)    | 0.140                   | 0.987                   | <0.001 |
| <i>Renal biochemistry€</i>                   |                         |                         |        |
| eGFR (ml/min/1.73m <sup>2</sup> )            | 70.07 ± 23.91           | 85.37 ± 28.52           | <0.001 |
| BUN (mg/dL)                                  | 17.00 (13.00, 23.00)    | 15.00 (11.00, 19.00)    | 0.005  |
| Serum creatinine (mg/dL)                     | 1.12 (0.90, 1.41)       | 0.93 (0.78, 1.15)       | <0.001 |

|                    |            |             |        |
|--------------------|------------|-------------|--------|
| Uric acid (mg/dL)¥ | 6.45 ±1.78 | 5.18 ± 1.51 | <0.001 |
|--------------------|------------|-------------|--------|

Abbreviations: BMI: body mass index; FBS: fasting blood sugar; eGFR: estimated glomerular filtration rate; BUN: blood urea nitrogen

Data \* was based on 93 patients; 4 patients had no mentioned indication. 2 patients from those who had gout and 3 from those labeled with asymptomatic hyperuricemia had also multiple/ recurrent renal stones.

Data \*\* based on 94 patients in allopurinol group, and 96 patients in control group;

Data \*\*\* based on 78 patients in allopurinol group, and 79 patients in control group;

Data€ based on 84 patients in allopurinol group; one patient did not have matching renal function tests, and 12 were on renal replacement therapy, and 97 patients in control group

Data ¥ based on 90 patients in allopurinol group, and 34 patients in control group;

**Table 2: Therapeutics comparisons between patients groups**

| Parameter                                                                            | Allopurinol group<br>N=97 | Control group<br>N=97    | P value      |
|--------------------------------------------------------------------------------------|---------------------------|--------------------------|--------------|
| <i>Diabetes mellitus medications</i>                                                 |                           |                          |              |
| Insulin                                                                              | 25 (25.77%)               | 27 (27.94%)              | 0.746        |
| Sulphonylureas                                                                       | 14 (14.43%)               | 20 (20.62%)              | 0.257        |
| Metformin                                                                            | 89 (91.75%)               | 94 (96.91%)              | 0.121        |
| Dipeptidyl peptidase-4 (DPP-4) inhibitors                                            | 30 (30.93%)               | 35 (36.08%)              | 0.447        |
| Sodium Glucose cotransporters (SGLTs) inhibitors                                     | 9 (9.28%)                 | 8 (8.25%)                | 0.800        |
| <a href="#">Glucagon-like peptide-1</a> (GLP-1) agonists                             | 6 (6.19%)                 | 1 (1.03%)                | 0.054        |
| <i>Other medications</i>                                                             |                           |                          |              |
| Angiotensin Converting Enzyme Inhibitors (ACEI)/ Angiotensin Receptor Blockers (ARB) | 16 (16.49%)/ 51 (52.58%)  | 24 (24.74%)/ 35 (36.08%) | 0.156/ 0.021 |
| Beta-blockers/ Calcium channel blockers                                              | 48 (49.48%)/ 48 (49.48%)  | 27 (27.84%)/ 27 (27.84%) | 0.002/ 0.002 |
| Hydrochlorothiazide/ Furosemide                                                      | 26 (26.80%)/22 (22.68%)   | 15 (15.46%)/10 (10.31%)  | 0.053/ 0.020 |
| Spironolactone                                                                       | 8 (8.25%)                 | 3 (3.09%)                | 0.121        |
| Aspirin /Clopidogrel                                                                 |                           |                          |              |

|                     |                         |                         |             |
|---------------------|-------------------------|-------------------------|-------------|
| Statins/Fenofibrate | 44 (45.36%)/8 (8.25%)   | 58 (59.79%)/10 (10.31%) | 0.044/0.621 |
| Nitrates            | 78 (80.41%)/10 (10.31%) | 77 (79.38%)/7 (7.22%)   | 0.858/0.446 |
| Digoxin             | 8 (8.25%)               | 7 (7.22%)               | 0.788       |
| Warfarin            | 1 (1.03%)               | 1 (1.03%)               | 1.000       |
|                     | 1 (1.03%)               | 2 (2.06%)               | 0.561       |

Chi-squared test for association was used for the comparisons
